# Supplementary material for: Solar radiometer sensing of multi-year aerosol features over a tropical urbanstation: Direct Sun and inversion products
Source: Copernicus journal article supplement (doi:10.5194/amt-2019-437), 2019-12-20
Supplement: Supplementary file [file amt-2019-437-RC1-supplement.pdf]

## **Solar radiometer sensing of multi-year aerosol features over a tropical urban station: Direct Sun and inversion products**

1. The use of some verbal forms are not appropriate. Proper spaces is missing in the manuscript. A comprehensive revision of English Language throughout is needed to ensure the quality of manuscript.
2. Line No 77, Pune is the ninth largest....As per recent data, it is 8th largest municipal corporation. Please provide the reference.
3. Line No 81, as per 2016 census. The last census was conducted in 2011. Please provide the reference.
4. Line No 82, the sentence "The City is situated centrally between.....air". The meaning of this sentence is not clear. Remove this sentence on provide the reference.
5. Line No 109, insert "for" after daily data.
6. Line No 110, the word "plotted" to be deleted.
7. Line No 163-164 to be rewrite for the improvement of the sentence.
8. Line No 178 remove "a" before 1:30 PM.
9. Line No 184, to be write as AOD at 550 nm and water vapour observation used.
10. Line No 223, Add more references like Kaskaoutis et al., 2009; Pathak et al., 2012; Verma et al., 2015 etc...
11. Line No 260, This Criteria is based upon fine mode **fraction** (FMF). It could not be modified due to fractional value. Therefore, this aerosol classification to be done on the basis of Lee et al., 2010.
12. Line 274, the aerosol type graph should be scatter to show the complete range of different AOD, AE, FMF and SSA for different aerosols. Please redraw these graphs.
13. Line No 303, Is standard deviation same for all AOD at different wavelength? Please check it.
14. Line No 320, What is the meaning of "decreasing from winter to pre-monsoon"? It gives contradictory information. Please check and correct it.
15. Line No 321, the reference to be written as per prescribed format. Sumit et al., 2011 to be written as Kumar et al., 2011.
16. Line No 323, due to festive celebrations. Which festive celebration in pre-monsoon season is responsible for abundant of anthropogenic aerosols?
17. Line No 325, "Cloudy in nature". In previous paragraph, it was mentioned that all observations are taken during clear sky days. It is providing the contradictory meaning. Is the data collected in overcast condition?
18. Line 354, Before this line the sub heading "Columnar Water Vapor" to be included instead at Line No 366.
19. In the manuscript, the word **shown plotted** has used. Please correct the word in complete manuscript. It should be only shown or plotted.
20. Line No 394, the reference to be written as per prescribed format. Sumit et al., 2011 to be written as Kumar et al., 2011.
21. Line No 418, the reference to be written as per prescribed format. Sumit et al., 2011 to be written as Kumar et al., 2011.
22. Line No 455, atmospheric element....It is not clear. Write clearly.
23. Line No 504-505, Write the correct... explanation of SSA increase.
24. Line No 598-599, Write the explanation of increase of imaginary part with wavelength increases.

25. Line No 619-620, Is it the only reason?. Provide the explanation of this increase and decrease.
26. Line No 631-634, this sentence to be rewrite for better understanding.
27. In Radiative Forcing section, Methodology is not mentioned. Which model used for this study and write the procedure in brief. Compare these radiative forcing results with other Indian sites.
28. Seasonal variation of aerosol types, the criteria of Lee et al, 2010 is not followed for FMF and SSA. These results are not accepted. Do the complete aerosol type again and the comparison to be done with other Indian sites i.e. Hyderabad, Jaipur, Varanasi etc.
29. Line No 743, The correlation between AERONET AOD and OMI AOD is very less. What is the reason of low correlation?
